# Supplementary material for: 3DProtDTA: a deep learning model for drug-target affinity prediction based on residue-level protein graphs
Source: Royal Society of Chemistry journal article supplement (doi:10.1039/d3ra00281k), 2023-01-01
Supplement: d3ra00281k1.pdf [file d3ra00281k1.pdf]

# 3DProtDTA: the deep learning model for drug-target affinity prediction based on the residue-level protein graphs

## Supplementary Information

Taras Voitsitskiy, Roman Stratiichuk, Ihor Koleiev, Leonid Popryho, Zakhar Ostrovsky, Pavlo Henitsoi, Ivan Khropachev, Volodymyr Vozniak, Roman Zhytar, Diana Nechepurenko, Semen Yesylevskyy, Alan Nafiev, Serhii Starosyla

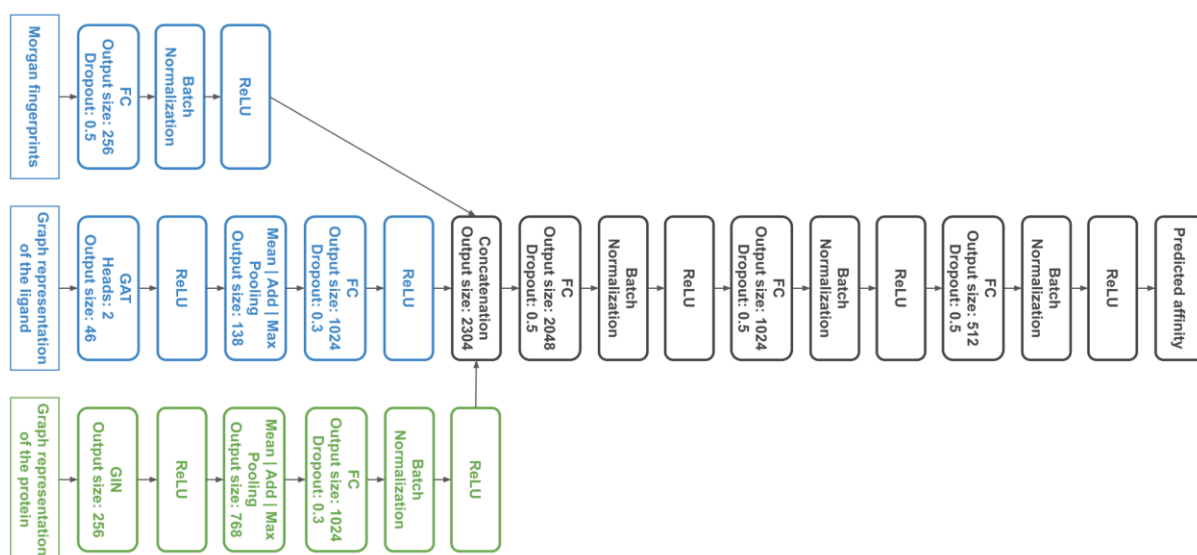

**Figure S1.** 3DProtDTA model architecture tuned by Tree-structured Parzen Estimator algorithm.

| dataset | experiment      | case         | fold | mse   | ci    | rm2   |
|---------|-----------------|--------------|------|-------|-------|-------|
| Davis   | ligand features | Graph+Morgan | 1    | 0.178 | 0.910 | 0.759 |
| Davis   | ligand features | Graph+Morgan | 2    | 0.166 | 0.920 | 0.769 |
| Davis   | ligand features | Graph+Morgan | 3    | 0.172 | 0.918 | 0.725 |
| Davis   | ligand features | Graph+Morgan | 4    | 0.165 | 0.923 | 0.730 |
| Davis   | ligand features | Graph+Morgan | 5    | 0.182 | 0.913 | 0.733 |

|       |                 |              |   |       |       |       |
|-------|-----------------|--------------|---|-------|-------|-------|
| Davis | ligand features | Graph        | 1 | 0.177 | 0.912 | 0.765 |
| Davis | ligand features | Graph        | 2 | 0.173 | 0.918 | 0.759 |
| Davis | ligand features | Graph        | 3 | 0.177 | 0.920 | 0.713 |
| Davis | ligand features | Graph        | 4 | 0.161 | 0.921 | 0.758 |
| Davis | ligand features | Graph        | 5 | 0.182 | 0.912 | 0.744 |
| Davis | ligand features | Morgan       | 1 | 0.189 | 0.908 | 0.744 |
| Davis | ligand features | Morgan       | 2 | 0.176 | 0.907 | 0.758 |
| Davis | ligand features | Morgan       | 3 | 0.181 | 0.919 | 0.684 |
| Davis | ligand features | Morgan       | 4 | 0.173 | 0.918 | 0.724 |
| Davis | ligand features | Morgan       | 5 | 0.186 | 0.911 | 0.719 |
| Davis | graph pooling   | mean+add+max | 1 | 0.178 | 0.910 | 0.759 |
| Davis | graph pooling   | mean+add+max | 2 | 0.166 | 0.920 | 0.769 |
| Davis | graph pooling   | mean+add+max | 3 | 0.172 | 0.918 | 0.725 |
| Davis | graph pooling   | mean+add+max | 4 | 0.165 | 0.923 | 0.730 |
| Davis | graph pooling   | mean+add+max | 5 | 0.182 | 0.913 | 0.733 |
| Davis | graph pooling   | mean         | 1 | 0.173 | 0.912 | 0.752 |
| Davis | graph pooling   | mean         | 2 | 0.168 | 0.919 | 0.754 |
| Davis | graph pooling   | mean         | 3 | 0.177 | 0.921 | 0.695 |
| Davis | graph pooling   | mean         | 4 | 0.163 | 0.920 | 0.744 |
| Davis | graph pooling   | mean         | 5 | 0.181 | 0.914 | 0.725 |
| Davis | graph pooling   | add          | 1 | 0.173 | 0.913 | 0.753 |
| Davis | graph pooling   | add          | 2 | 0.166 | 0.921 | 0.769 |
| Davis | graph pooling   | add          | 3 | 0.175 | 0.918 | 0.738 |
| Davis | graph pooling   | add          | 4 | 0.162 | 0.924 | 0.752 |

|       |               |      |   |       |       |       |
|-------|---------------|------|---|-------|-------|-------|
| Davis | graph pooling | add  | 5 | 0.181 | 0.915 | 0.763 |
| Davis | graph pooling | max  | 1 | 0.185 | 0.912 | 0.757 |
| Davis | graph pooling | max  | 2 | 0.174 | 0.925 | 0.757 |
| Davis | graph pooling | max  | 3 | 0.177 | 0.917 | 0.732 |
| Davis | graph pooling | max  | 4 | 0.175 | 0.920 | 0.745 |
| Davis | graph pooling | max  | 5 | 0.195 | 0.914 | 0.738 |
| Davis | ligand GNN    | GAT  | 1 | 0.178 | 0.910 | 0.759 |
| Davis | ligand GNN    | GAT  | 2 | 0.166 | 0.920 | 0.769 |
| Davis | ligand GNN    | GAT  | 3 | 0.172 | 0.918 | 0.725 |
| Davis | ligand GNN    | GAT  | 4 | 0.165 | 0.923 | 0.730 |
| Davis | ligand GNN    | GAT  | 5 | 0.182 | 0.913 | 0.733 |
| Davis | ligand GNN    | GCN  | 1 | 0.172 | 0.913 | 0.775 |
| Davis | ligand GNN    | GCN  | 2 | 0.168 | 0.917 | 0.766 |
| Davis | ligand GNN    | GCN  | 3 | 0.182 | 0.922 | 0.704 |
| Davis | ligand GNN    | GCN  | 4 | 0.166 | 0.924 | 0.738 |
| Davis | ligand GNN    | GCN  | 5 | 0.179 | 0.913 | 0.743 |
| Davis | ligand GNN    | GIN  | 1 | 0.170 | 0.915 | 0.775 |
| Davis | ligand GNN    | GIN  | 2 | 0.163 | 0.916 | 0.778 |
| Davis | ligand GNN    | GIN  | 3 | 0.173 | 0.918 | 0.724 |
| Davis | ligand GNN    | GIN  | 4 | 0.167 | 0.923 | 0.771 |
| Davis | ligand GNN    | GIN  | 5 | 0.175 | 0.914 | 0.742 |
| Davis | ligand GNN    | GINE | 1 | 0.171 | 0.917 | 0.768 |
| Davis | ligand GNN    | GINE | 2 | 0.165 | 0.917 | 0.760 |
| Davis | ligand GNN    | GINE | 3 | 0.176 | 0.918 | 0.714 |

|       |             |      |   |       |       |       |
|-------|-------------|------|---|-------|-------|-------|
| Davis | ligand GNN  | GINE | 4 | 0.168 | 0.919 | 0.764 |
| Davis | ligand GNN  | GINE | 5 | 0.179 | 0.915 | 0.765 |
| Davis | ligand GNN  | GMF  | 1 | 0.174 | 0.917 | 0.765 |
| Davis | ligand GNN  | GMF  | 2 | 0.173 | 0.922 | 0.736 |
| Davis | ligand GNN  | GMF  | 3 | 0.178 | 0.922 | 0.722 |
| Davis | ligand GNN  | GMF  | 4 | 0.163 | 0.921 | 0.750 |
| Davis | ligand GNN  | GMF  | 5 | 0.181 | 0.916 | 0.762 |
| Davis | protein GNN | GAT  | 1 | 0.170 | 0.914 | 0.748 |
| Davis | protein GNN | GAT  | 2 | 0.166 | 0.920 | 0.742 |
| Davis | protein GNN | GAT  | 3 | 0.177 | 0.923 | 0.705 |
| Davis | protein GNN | GAT  | 4 | 0.158 | 0.921 | 0.747 |
| Davis | protein GNN | GAT  | 5 | 0.188 | 0.913 | 0.747 |
| Davis | protein GNN | GCN  | 1 | 0.173 | 0.912 | 0.752 |
| Davis | protein GNN | GCN  | 2 | 0.166 | 0.915 | 0.774 |
| Davis | protein GNN | GCN  | 3 | 0.172 | 0.921 | 0.710 |
| Davis | protein GNN | GCN  | 4 | 0.162 | 0.924 | 0.739 |
| Davis | protein GNN | GCN  | 5 | 0.185 | 0.914 | 0.737 |
| Davis | protein GNN | GIN  | 1 | 0.178 | 0.910 | 0.759 |
| Davis | protein GNN | GIN  | 2 | 0.166 | 0.920 | 0.769 |
| Davis | protein GNN | GIN  | 3 | 0.172 | 0.918 | 0.725 |
| Davis | protein GNN | GIN  | 4 | 0.165 | 0.923 | 0.730 |
| Davis | protein GNN | GIN  | 5 | 0.182 | 0.913 | 0.733 |
| Davis | protein GNN | GINE | 1 | 0.178 | 0.913 | 0.790 |
| Davis | protein GNN | GINE | 2 | 0.169 | 0.917 | 0.770 |

|       |             |      |   |       |       |       |
|-------|-------------|------|---|-------|-------|-------|
| Davis | protein GNN | GINE | 3 | 0.178 | 0.917 | 0.727 |
| Davis | protein GNN | GINE | 4 | 0.168 | 0.925 | 0.762 |
| Davis | protein GNN | GINE | 5 | 0.185 | 0.911 | 0.752 |
| Davis | protein GNN | GMF  | 1 | 0.186 | 0.915 | 0.736 |
| Davis | protein GNN | GMF  | 2 | 0.178 | 0.918 | 0.760 |
| Davis | protein GNN | GMF  | 3 | 0.182 | 0.916 | 0.718 |
| Davis | protein GNN | GMF  | 4 | 0.174 | 0.918 | 0.760 |
| Davis | protein GNN | GMF  | 5 | 0.193 | 0.911 | 0.734 |

**Table S2. Detailed 5-fold cross-validation results for the KIBA dataset.**

| dataset | experiment      | case         | fold | mse   | ci    | rm2   |
|---------|-----------------|--------------|------|-------|-------|-------|
| KIBA    | ligand features | Graph+Morgan | 1    | 0.137 | 0.897 | 0.805 |
| KIBA    | ligand features | Graph+Morgan | 2    | 0.147 | 0.892 | 0.789 |
| KIBA    | ligand features | Graph+Morgan | 3    | 0.145 | 0.895 | 0.796 |
| KIBA    | ligand features | Graph+Morgan | 4    | 0.154 | 0.890 | 0.772 |
| KIBA    | ligand features | Graph+Morgan | 5    | 0.146 | 0.890 | 0.777 |
| KIBA    | ligand features | Graph        | 1    | 0.150 | 0.886 | 0.788 |
| KIBA    | ligand features | Graph        | 2    | 0.162 | 0.883 | 0.774 |
| KIBA    | ligand features | Graph        | 3    | 0.165 | 0.883 | 0.764 |
| KIBA    | ligand features | Graph        | 4    | 0.172 | 0.876 | 0.762 |
| KIBA    | ligand features | Graph        | 5    | 0.159 | 0.879 | 0.776 |
| KIBA    | ligand features | Morgan       | 1    | 0.151 | 0.891 | 0.783 |
| KIBA    | ligand features | Morgan       | 2    | 0.160 | 0.888 | 0.771 |
| KIBA    | ligand features | Morgan       | 3    | 0.158 | 0.888 | 0.776 |
| KIBA    | ligand features | Morgan       | 4    | 0.167 | 0.881 | 0.756 |

|      |                 |              |   |       |       |       |
|------|-----------------|--------------|---|-------|-------|-------|
| KIBA | ligand features | Morgan       | 5 | 0.156 | 0.885 | 0.764 |
| KIBA | graph pooling   | mean+add+max | 1 | 0.137 | 0.897 | 0.805 |
| KIBA | graph pooling   | mean+add+max | 2 | 0.147 | 0.892 | 0.789 |
| KIBA | graph pooling   | mean+add+max | 3 | 0.145 | 0.895 | 0.796 |
| KIBA | graph pooling   | mean+add+max | 4 | 0.154 | 0.890 | 0.772 |
| KIBA | graph pooling   | mean+add+max | 5 | 0.146 | 0.890 | 0.777 |
| KIBA | graph pooling   | mean         | 1 | 0.143 | 0.893 | 0.792 |
| KIBA | graph pooling   | mean         | 2 | 0.151 | 0.890 | 0.776 |
| KIBA | graph pooling   | mean         | 3 | 0.151 | 0.892 | 0.794 |
| KIBA | graph pooling   | mean         | 4 | 0.160 | 0.886 | 0.751 |
| KIBA | graph pooling   | mean         | 5 | 0.149 | 0.889 | 0.795 |
| KIBA | graph pooling   | add          | 1 | 0.138 | 0.895 | 0.795 |
| KIBA | graph pooling   | add          | 2 | 0.147 | 0.892 | 0.793 |
| KIBA | graph pooling   | add          | 3 | 0.143 | 0.894 | 0.778 |
| KIBA | graph pooling   | add          | 4 | 0.154 | 0.888 | 0.748 |
| KIBA | graph pooling   | add          | 5 | 0.142 | 0.891 | 0.797 |
| KIBA | graph pooling   | max          | 1 | 0.139 | 0.897 | 0.804 |
| KIBA | graph pooling   | max          | 2 | 0.154 | 0.892 | 0.767 |
| KIBA | graph pooling   | max          | 3 | 0.150 | 0.894 | 0.796 |
| KIBA | graph pooling   | max          | 4 | 0.157 | 0.886 | 0.777 |
| KIBA | graph pooling   | max          | 5 | 0.146 | 0.891 | 0.787 |
| KIBA | ligand GNN      | GAT          | 1 | 0.137 | 0.897 | 0.805 |
| KIBA | ligand GNN      | GAT          | 2 | 0.147 | 0.892 | 0.789 |
| KIBA | ligand GNN      | GAT          | 3 | 0.145 | 0.895 | 0.796 |

|      |             |      |   |       |       |       |
|------|-------------|------|---|-------|-------|-------|
| KIBA | ligand GNN  | GAT  | 4 | 0.154 | 0.890 | 0.772 |
| KIBA | ligand GNN  | GAT  | 5 | 0.146 | 0.890 | 0.777 |
| KIBA | ligand GNN  | GCN  | 1 | 0.138 | 0.897 | 0.796 |
| KIBA | ligand GNN  | GCN  | 2 | 0.151 | 0.893 | 0.790 |
| KIBA | ligand GNN  | GCN  | 3 | 0.147 | 0.894 | 0.800 |
| KIBA | ligand GNN  | GCN  | 4 | 0.159 | 0.887 | 0.784 |
| KIBA | ligand GNN  | GCN  | 5 | 0.143 | 0.890 | 0.794 |
| KIBA | ligand GNN  | GIN  | 1 | 0.140 | 0.897 | 0.796 |
| KIBA | ligand GNN  | GIN  | 2 | 0.148 | 0.891 | 0.793 |
| KIBA | ligand GNN  | GIN  | 3 | 0.149 | 0.895 | 0.791 |
| KIBA | ligand GNN  | GIN  | 4 | 0.158 | 0.887 | 0.774 |
| KIBA | ligand GNN  | GIN  | 5 | 0.145 | 0.889 | 0.788 |
| KIBA | ligand GNN  | GINE | 1 | 0.138 | 0.897 | 0.801 |
| KIBA | ligand GNN  | GINE | 2 | 0.146 | 0.895 | 0.786 |
| KIBA | ligand GNN  | GINE | 3 | 0.147 | 0.895 | 0.792 |
| KIBA | ligand GNN  | GINE | 4 | 0.156 | 0.889 | 0.783 |
| KIBA | ligand GNN  | GINE | 5 | 0.145 | 0.891 | 0.797 |
| KIBA | ligand GNN  | GMF  | 1 | 0.138 | 0.897 | 0.784 |
| KIBA | ligand GNN  | GMF  | 2 | 0.149 | 0.892 | 0.764 |
| KIBA | ligand GNN  | GMF  | 3 | 0.145 | 0.896 | 0.796 |
| KIBA | ligand GNN  | GMF  | 4 | 0.155 | 0.887 | 0.774 |
| KIBA | ligand GNN  | GMF  | 5 | 0.143 | 0.892 | 0.790 |
| KIBA | protein GNN | GAT  | 1 | 0.144 | 0.896 | 0.794 |
| KIBA | protein GNN | GAT  | 2 | 0.152 | 0.892 | 0.772 |

|      |             |      |   |       |       |       |
|------|-------------|------|---|-------|-------|-------|
| KIBA | protein GNN | GAT  | 3 | 0.147 | 0.892 | 0.792 |
| KIBA | protein GNN | GAT  | 4 | 0.154 | 0.888 | 0.769 |
| KIBA | protein GNN | GAT  | 5 | 0.144 | 0.891 | 0.798 |
| KIBA | protein GNN | GCN  | 1 | 0.140 | 0.897 | 0.790 |
| KIBA | protein GNN | GCN  | 2 | 0.150 | 0.893 | 0.783 |
| KIBA | protein GNN | GCN  | 3 | 0.150 | 0.893 | 0.789 |
| KIBA | protein GNN | GCN  | 4 | 0.156 | 0.888 | 0.783 |
| KIBA | protein GNN | GCN  | 5 | 0.148 | 0.891 | 0.790 |
| KIBA | protein GNN | GIN  | 1 | 0.137 | 0.897 | 0.805 |
| KIBA | protein GNN | GIN  | 2 | 0.147 | 0.892 | 0.789 |
| KIBA | protein GNN | GIN  | 3 | 0.145 | 0.895 | 0.796 |
| KIBA | protein GNN | GIN  | 4 | 0.154 | 0.890 | 0.772 |
| KIBA | protein GNN | GIN  | 5 | 0.146 | 0.890 | 0.777 |
| KIBA | protein GNN | GINE | 1 | 0.138 | 0.898 | 0.799 |
| KIBA | protein GNN | GINE | 2 | 0.150 | 0.893 | 0.789 |
| KIBA | protein GNN | GINE | 3 | 0.145 | 0.894 | 0.797 |
| KIBA | protein GNN | GINE | 4 | 0.155 | 0.888 | 0.776 |
| KIBA | protein GNN | GINE | 5 | 0.143 | 0.891 | 0.798 |
| KIBA | protein GNN | GMF  | 1 | 0.140 | 0.896 | 0.794 |
| KIBA | protein GNN | GMF  | 2 | 0.150 | 0.892 | 0.780 |
| KIBA | protein GNN | GMF  | 3 | 0.149 | 0.891 | 0.782 |
| KIBA | protein GNN | GMF  | 4 | 0.157 | 0.887 | 0.761 |
| KIBA | protein GNN | GMF  | 5 | 0.146 | 0.890 | 0.790 |



**Table S3. 5-fold mean and standard deviation for each experiment, Davis dataset.**

| dataset | experiment      | case         | mse_mean | ci_mean | rm2_mean | mse_std | ci_std | rm2_std |
|---------|-----------------|--------------|----------|---------|----------|---------|--------|---------|
| Davis   | ligand features | Graph+Morgan | 0.173    | 0.917   | 0.743    | 0.007   | 0.005  | 0.020   |
| Davis   | ligand features | Graph        | 0.174    | 0.917   | 0.748    | 0.008   | 0.004  | 0.021   |
| Davis   | ligand features | Morgan       | 0.181    | 0.913   | 0.726    | 0.007   | 0.006  | 0.028   |
| Davis   | graph pooling   | mean+add+max | 0.173    | 0.917   | 0.743    | 0.007   | 0.005  | 0.020   |
| Davis   | graph pooling   | mean         | 0.172    | 0.917   | 0.734    | 0.007   | 0.004  | 0.024   |
| Davis   | graph pooling   | add          | 0.171    | 0.918   | 0.755    | 0.007   | 0.004  | 0.012   |
| Davis   | graph pooling   | max          | 0.181    | 0.918   | 0.746    | 0.009   | 0.005  | 0.011   |
| Davis   | ligand GNN      | GAT          | 0.173    | 0.917   | 0.743    | 0.007   | 0.005  | 0.020   |
| Davis   | ligand GNN      | GCN          | 0.174    | 0.918   | 0.745    | 0.007   | 0.005  | 0.028   |
| Davis   | ligand GNN      | GIN          | 0.170    | 0.917   | 0.758    | 0.005   | 0.004  | 0.024   |
| Davis   | ligand GNN      | GINE         | 0.172    | 0.917   | 0.754    | 0.006   | 0.001  | 0.023   |
| Davis   | ligand GNN      | GMF          | 0.174    | 0.920   | 0.747    | 0.007   | 0.003  | 0.018   |
| Davis   | protein GNN     | GAT          | 0.172    | 0.918   | 0.738    | 0.012   | 0.004  | 0.018   |
| Davis   | protein GNN     | GCN          | 0.172    | 0.917   | 0.742    | 0.009   | 0.005  | 0.023   |
| Davis   | protein GNN     | GIN          | 0.173    | 0.917   | 0.743    | 0.007   | 0.005  | 0.020   |
| Davis   | protein GNN     | GINE         | 0.176    | 0.917   | 0.760    | 0.007   | 0.005  | 0.023   |
| Davis   | protein GNN     | GMF          | 0.183    | 0.916   | 0.742    | 0.007   | 0.003  | 0.018   |

**Table S4. 5-fold mean and standard deviation for each experiment, KIBA dataset.**

| dataset | experiment      | case         | mse_mean | ci_mean | rm2_mean | mse_std | ci_std | rm2_std |
|---------|-----------------|--------------|----------|---------|----------|---------|--------|---------|
| KIBA    | ligand features | Graph+Morgan | 0.146    | 0.893   | 0.788    | 0.006   | 0.003  | 0.014   |
| KIBA    | ligand features | Graph        | 0.161    | 0.881   | 0.773    | 0.008   | 0.004  | 0.011   |
| KIBA    | ligand features | Morgan       | 0.158    | 0.887   | 0.770    | 0.006   | 0.004  | 0.010   |
| KIBA    | graph pooling   | mean+add+max | 0.146    | 0.893   | 0.788    | 0.006   | 0.003  | 0.014   |
| KIBA    | graph pooling   | mean         | 0.151    | 0.890   | 0.781    | 0.006   | 0.003  | 0.019   |
| KIBA    | graph pooling   | add          | 0.145    | 0.892   | 0.782    | 0.006   | 0.003  | 0.020   |
| KIBA    | graph pooling   | max          | 0.149    | 0.892   | 0.786    | 0.007   | 0.004  | 0.015   |
| KIBA    | ligand GNN      | GAT          | 0.146    | 0.893   | 0.788    | 0.006   | 0.003  | 0.014   |
| KIBA    | ligand GNN      | GCN          | 0.148    | 0.892   | 0.793    | 0.008   | 0.004  | 0.006   |
| KIBA    | ligand GNN      | GIN          | 0.148    | 0.892   | 0.789    | 0.007   | 0.004  | 0.009   |
| KIBA    | ligand GNN      | GINE         | 0.146    | 0.894   | 0.792    | 0.006   | 0.003  | 0.007   |

|      |             |      |       |       |       |       |       |       |
|------|-------------|------|-------|-------|-------|-------|-------|-------|
| KIBA | ligand GNN  | GMF  | 0.146 | 0.893 | 0.782 | 0.006 | 0.004 | 0.013 |
| KIBA | protein GNN | GAT  | 0.148 | 0.892 | 0.785 | 0.005 | 0.003 | 0.014 |
| KIBA | protein GNN | GCN  | 0.149 | 0.893 | 0.787 | 0.006 | 0.003 | 0.004 |
| KIBA | protein GNN | GIN  | 0.146 | 0.893 | 0.788 | 0.006 | 0.003 | 0.014 |
| KIBA | protein GNN | GINE | 0.146 | 0.893 | 0.792 | 0.006 | 0.004 | 0.010 |
| KIBA | protein GNN | GMF  | 0.149 | 0.891 | 0.781 | 0.006 | 0.003 | 0.013 |

**Table S5. 5-fold mean for each experiment, the average for the KIBA and Davis datasets.**

| experiment      | case         | mse   | ci    | rm2   |
|-----------------|--------------|-------|-------|-------|
| ligand features | Graph+Morgan | 0.159 | 0.905 | 0.765 |
| ligand features | Graph        | 0.168 | 0.899 | 0.760 |
| ligand features | Morgan       | 0.170 | 0.900 | 0.748 |
| graph pooling   | mean+add+max | 0.159 | 0.905 | 0.765 |
| graph pooling   | mean         | 0.162 | 0.903 | 0.758 |
| graph pooling   | add          | 0.158 | 0.905 | 0.769 |
| graph pooling   | max          | 0.165 | 0.905 | 0.766 |
| ligand GNN      | GAT          | 0.159 | 0.905 | 0.765 |
| ligand GNN      | GCN          | 0.161 | 0.905 | 0.769 |
| ligand GNN      | GIN          | 0.159 | 0.905 | 0.773 |
| ligand GNN      | GINE         | 0.159 | 0.906 | 0.773 |
| ligand GNN      | GMF          | 0.160 | 0.906 | 0.764 |
| protein GNN     | GAT          | 0.160 | 0.905 | 0.762 |
| protein GNN     | GCN          | 0.160 | 0.905 | 0.765 |
| protein GNN     | GIN          | 0.159 | 0.905 | 0.765 |
| protein GNN     | GINE         | 0.161 | 0.905 | 0.776 |
| protein GNN     | GMF          | 0.166 | 0.903 | 0.761 |

**Table S6. The number of proteins annotated by the top 20 InterPro entries for the Davis dataset.**

| InterPro ID | InterPro Name              | Number of Proteins |
|-------------|----------------------------|--------------------|
| IPR011009   | Kinase-like_dom_sf         | 375                |
| IPR000719   | Prot_kinase_dom            | 361                |
| IPR017441   | Protein_kinase_ATP_BS      | 323                |
| IPR008271   | Ser/Thr_kinase_AS          | 247                |
| IPR001245   | Ser-Thr/Tyr_kinase_cat_dom | 106                |

|           |                    |    |
|-----------|--------------------|----|
| IPR008266 | Tyr_kinase_AS      | 80 |
| IPR020635 | Tyr_kinase_cat_dom | 79 |
| IPR013783 | Ig-like_fold       | 41 |
| IPR000961 | AGC-kinase_C       | 38 |
| IPR036860 | SH2_dom_sf         | 28 |
| IPR000980 | SH2                | 28 |
| IPR001452 | SH3_domain         | 25 |
| IPR036028 | SH3-like_dom_sf    | 24 |
| IPR003961 | FN3_dom            | 23 |
| IPR036116 | FN3_sf             | 23 |
| IPR017892 | Pkinase_C          | 22 |
| IPR036179 | Ig-like_dom_sf     | 22 |
| IPR011993 | PH-like_dom_sf     | 21 |
| IPR007110 | Ig-like_dom        | 21 |
| IPR003599 | Ig_sub             | 19 |

**Table S7. The number of proteins annotated by the top 20 InterPro entries for the KIBA dataset.**

| <b>InterPro ID</b> | <b>InterPro Name</b>       | <b>Number of Proteins</b> |
|--------------------|----------------------------|---------------------------|
| IPR011009          | Kinase-like_dom_sf         | 221                       |
| IPR000719          | Prot_kinase_dom            | 213                       |
| IPR017441          | Protein_kinase_ATP_BS      | 202                       |
| IPR008271          | Ser/Thr_kinase_AS          | 136                       |
| IPR001245          | Ser-Thr/Tyr_kinase_cat_dom | 72                        |
| IPR020635          | Tyr_kinase_cat_dom         | 62                        |
| IPR008266          | Tyr_kinase_AS              | 62                        |
| IPR000961          | AGC-kinase_C               | 32                        |
| IPR013783          | Ig-like_fold               | 29                        |
| IPR036860          | SH2_dom_sf                 | 26                        |
| IPR000980          | SH2                        | 26                        |
| IPR017892          | Pkinase_C                  | 23                        |
| IPR036028          | SH3-like_dom_sf            | 21                        |
| IPR001452          | SH3_domain                 | 21                        |
| IPR007110          | Ig-like_dom                | 19                        |
| IPR036179          | Ig-like_dom_sf             | 19                        |
| IPR011993          | PH-like_dom_sf             | 17                        |
| IPR046349          | C1-like_sf                 | 17                        |
| IPR002219          | PE/DAG-bd                  | 17                        |
| IPR003599          | Ig_sub                     | 16                        |

**Table S8. Protein residue-level graphs similarity between AlphaFold and experimental structures.**

| <b>UniProt ID</b> | <b>PDB ID</b> | <b>n nodes, AlphaFold</b> | <b>n nodes, experimental</b> | <b>n intersecting nodes</b> | <b>n edges, AlphaFold</b> | <b>n edges, experimental</b> | <b>n intersecting edges</b> |
|-------------------|---------------|---------------------------|------------------------------|-----------------------------|---------------------------|------------------------------|-----------------------------|
| Q9P1W9            | 4x7q          | 255                       | 240                          | 237                         | 1416                      | 1360                         | 1282                        |
| O95819            | 4zp5          | 265                       | 253                          | 253                         | 1452                      | 1544                         | 1360                        |
| P06241            | 2dq7          | 254                       | 262                          | 252                         | 1466                      | 1452                         | 1385                        |
| P49760            | 6fyl          | 317                       | 340                          | 317                         | 1866                      | 2002                         | 1801                        |
| Q16539            | 4f9y          | 285                       | 275                          | 275                         | 1622                      | 1596                         | 1514                        |
| Q9UHD2            | 4euu          | 302                       | 298                          | 298                         | 1618                      | 1658                         | 1572                        |
| P05771            | 2i0e          | 330                       | 326                          | 323                         | 1878                      | 1794                         | 1650                        |
| Q15118            | 2q8g          | 231                       | 219                          | 219                         | 1214                      | 1210                         | 1166                        |
